# Supplementary figures and images for: Screening of potential biomarkers for polycystic ovary syndrome and identification of expression and immune characteristics
Source: PubMed Central journal article supplement (PMC10602247; doi:10.1371/journal.pone.0293447), 2023-10-26

groups —●— Control —●— PCOS

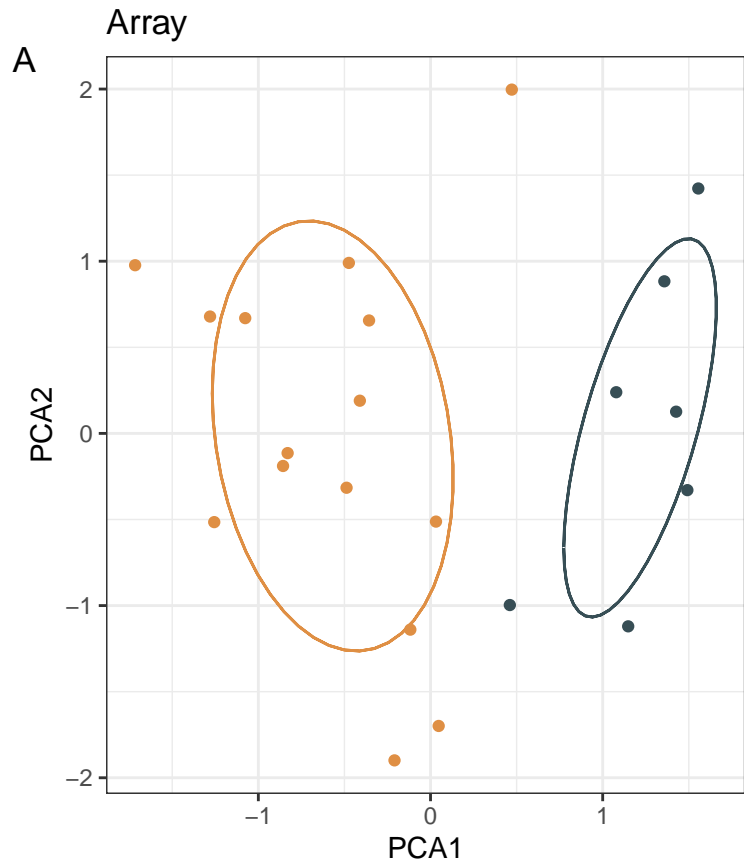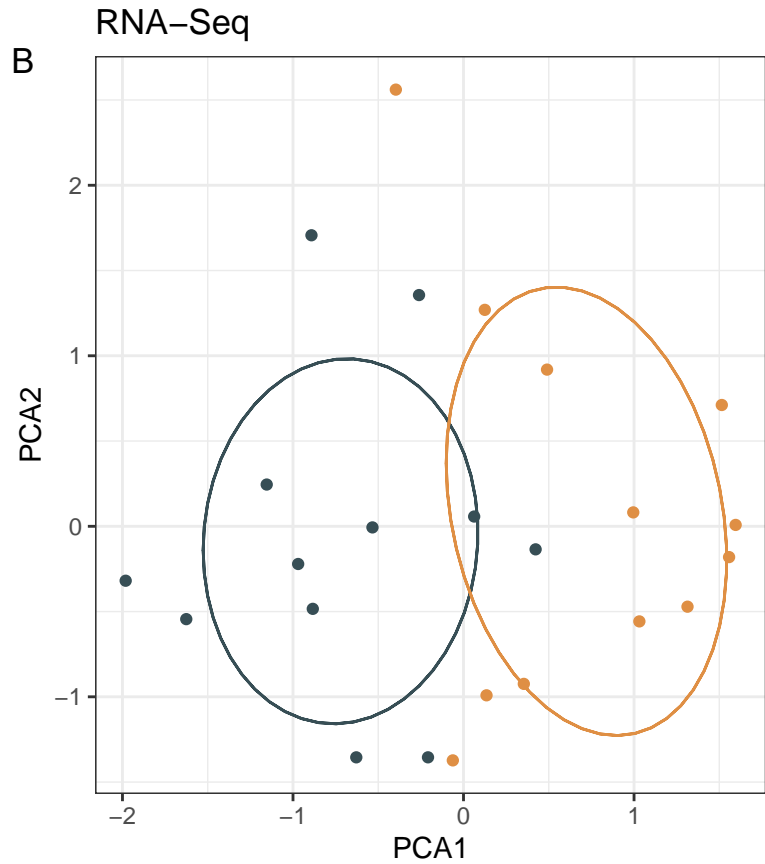

Supplement: pone.0293447.s001.pdf [file pone.0293447.s001.pdf]

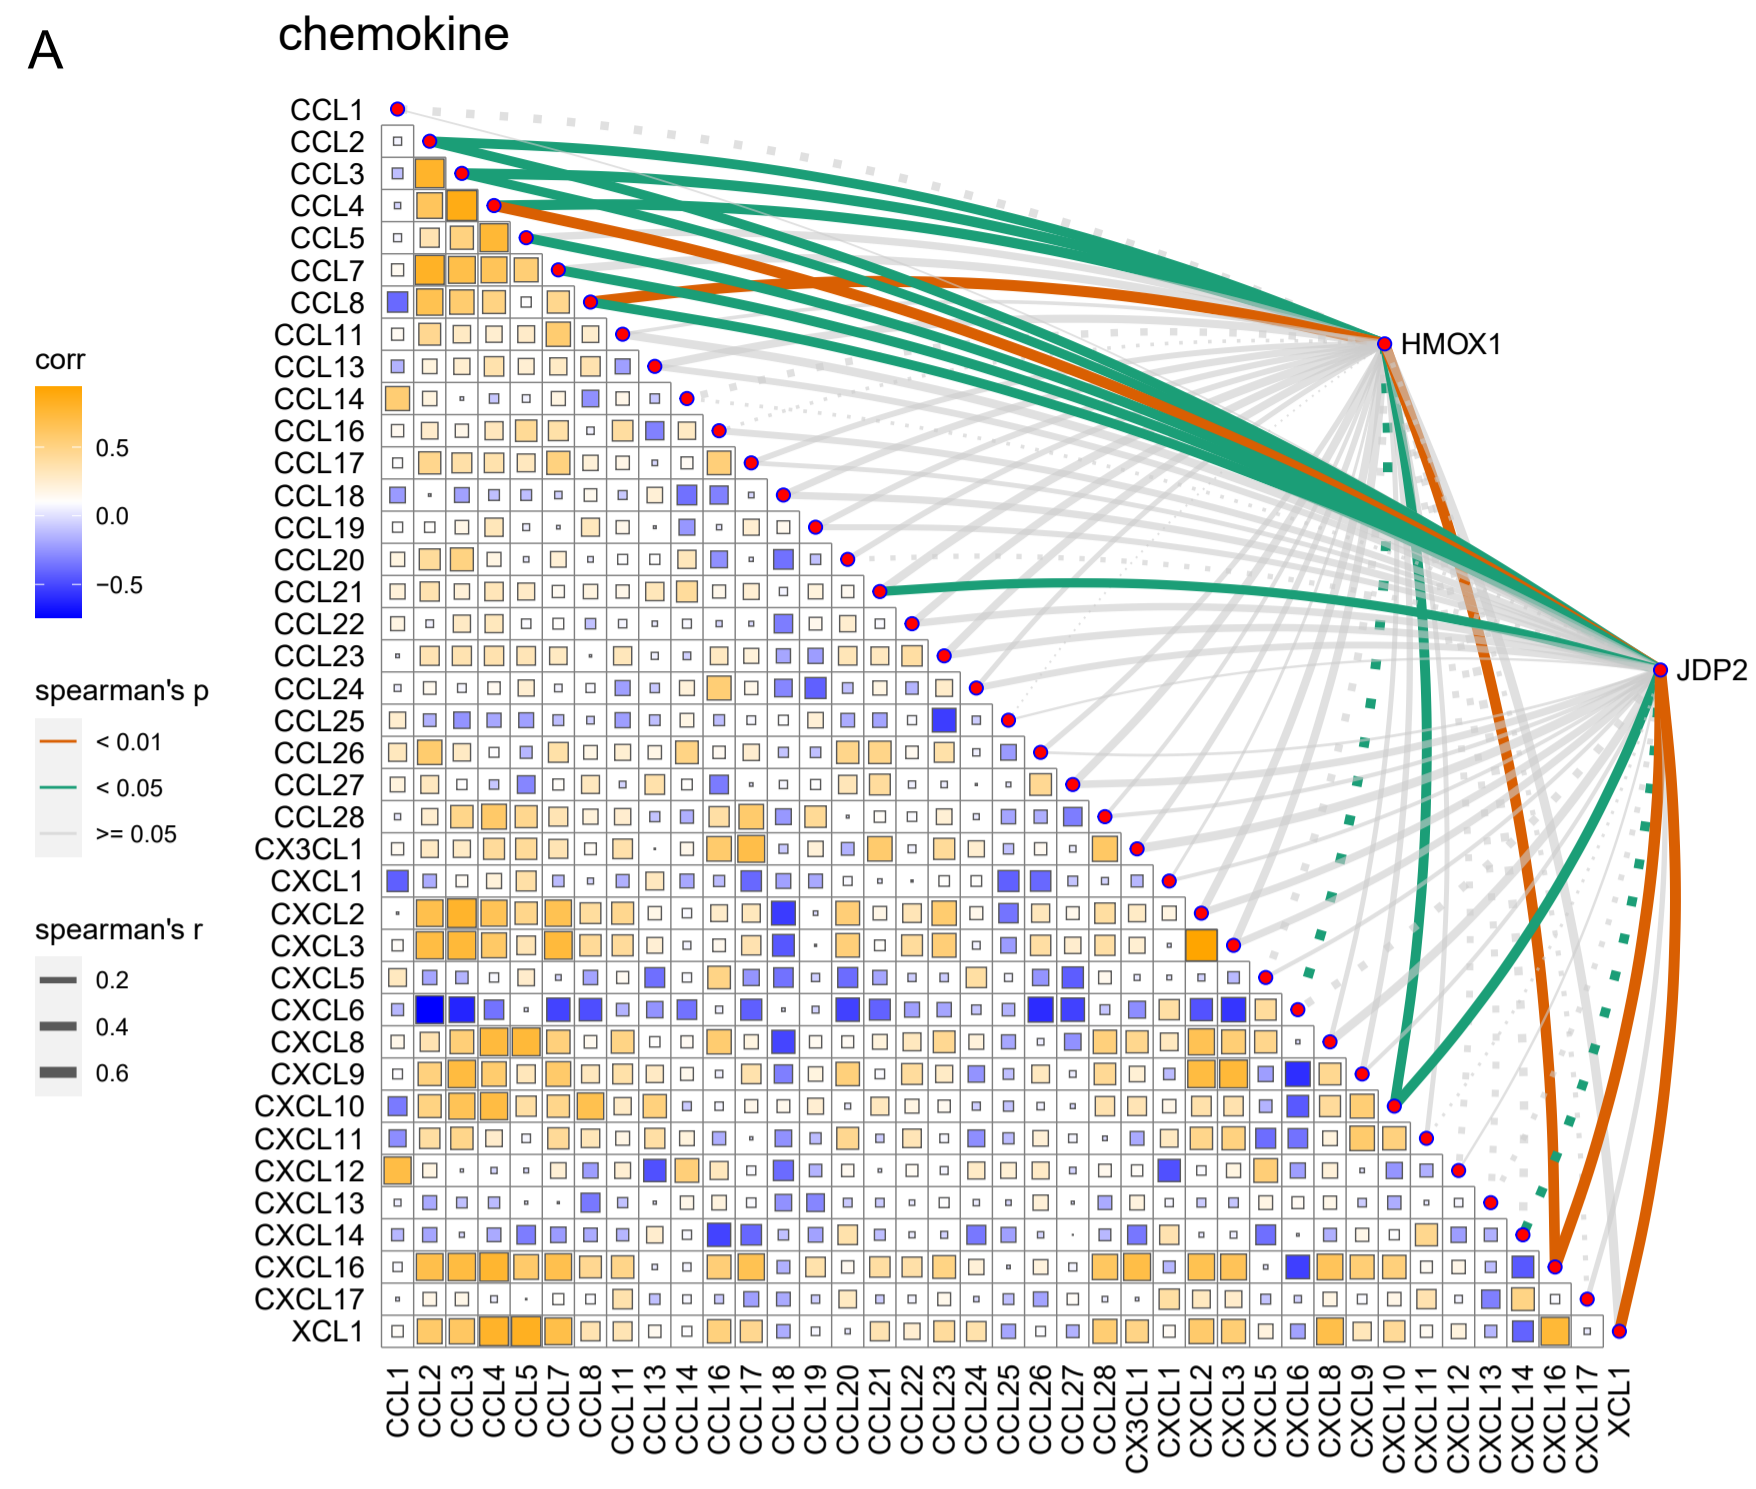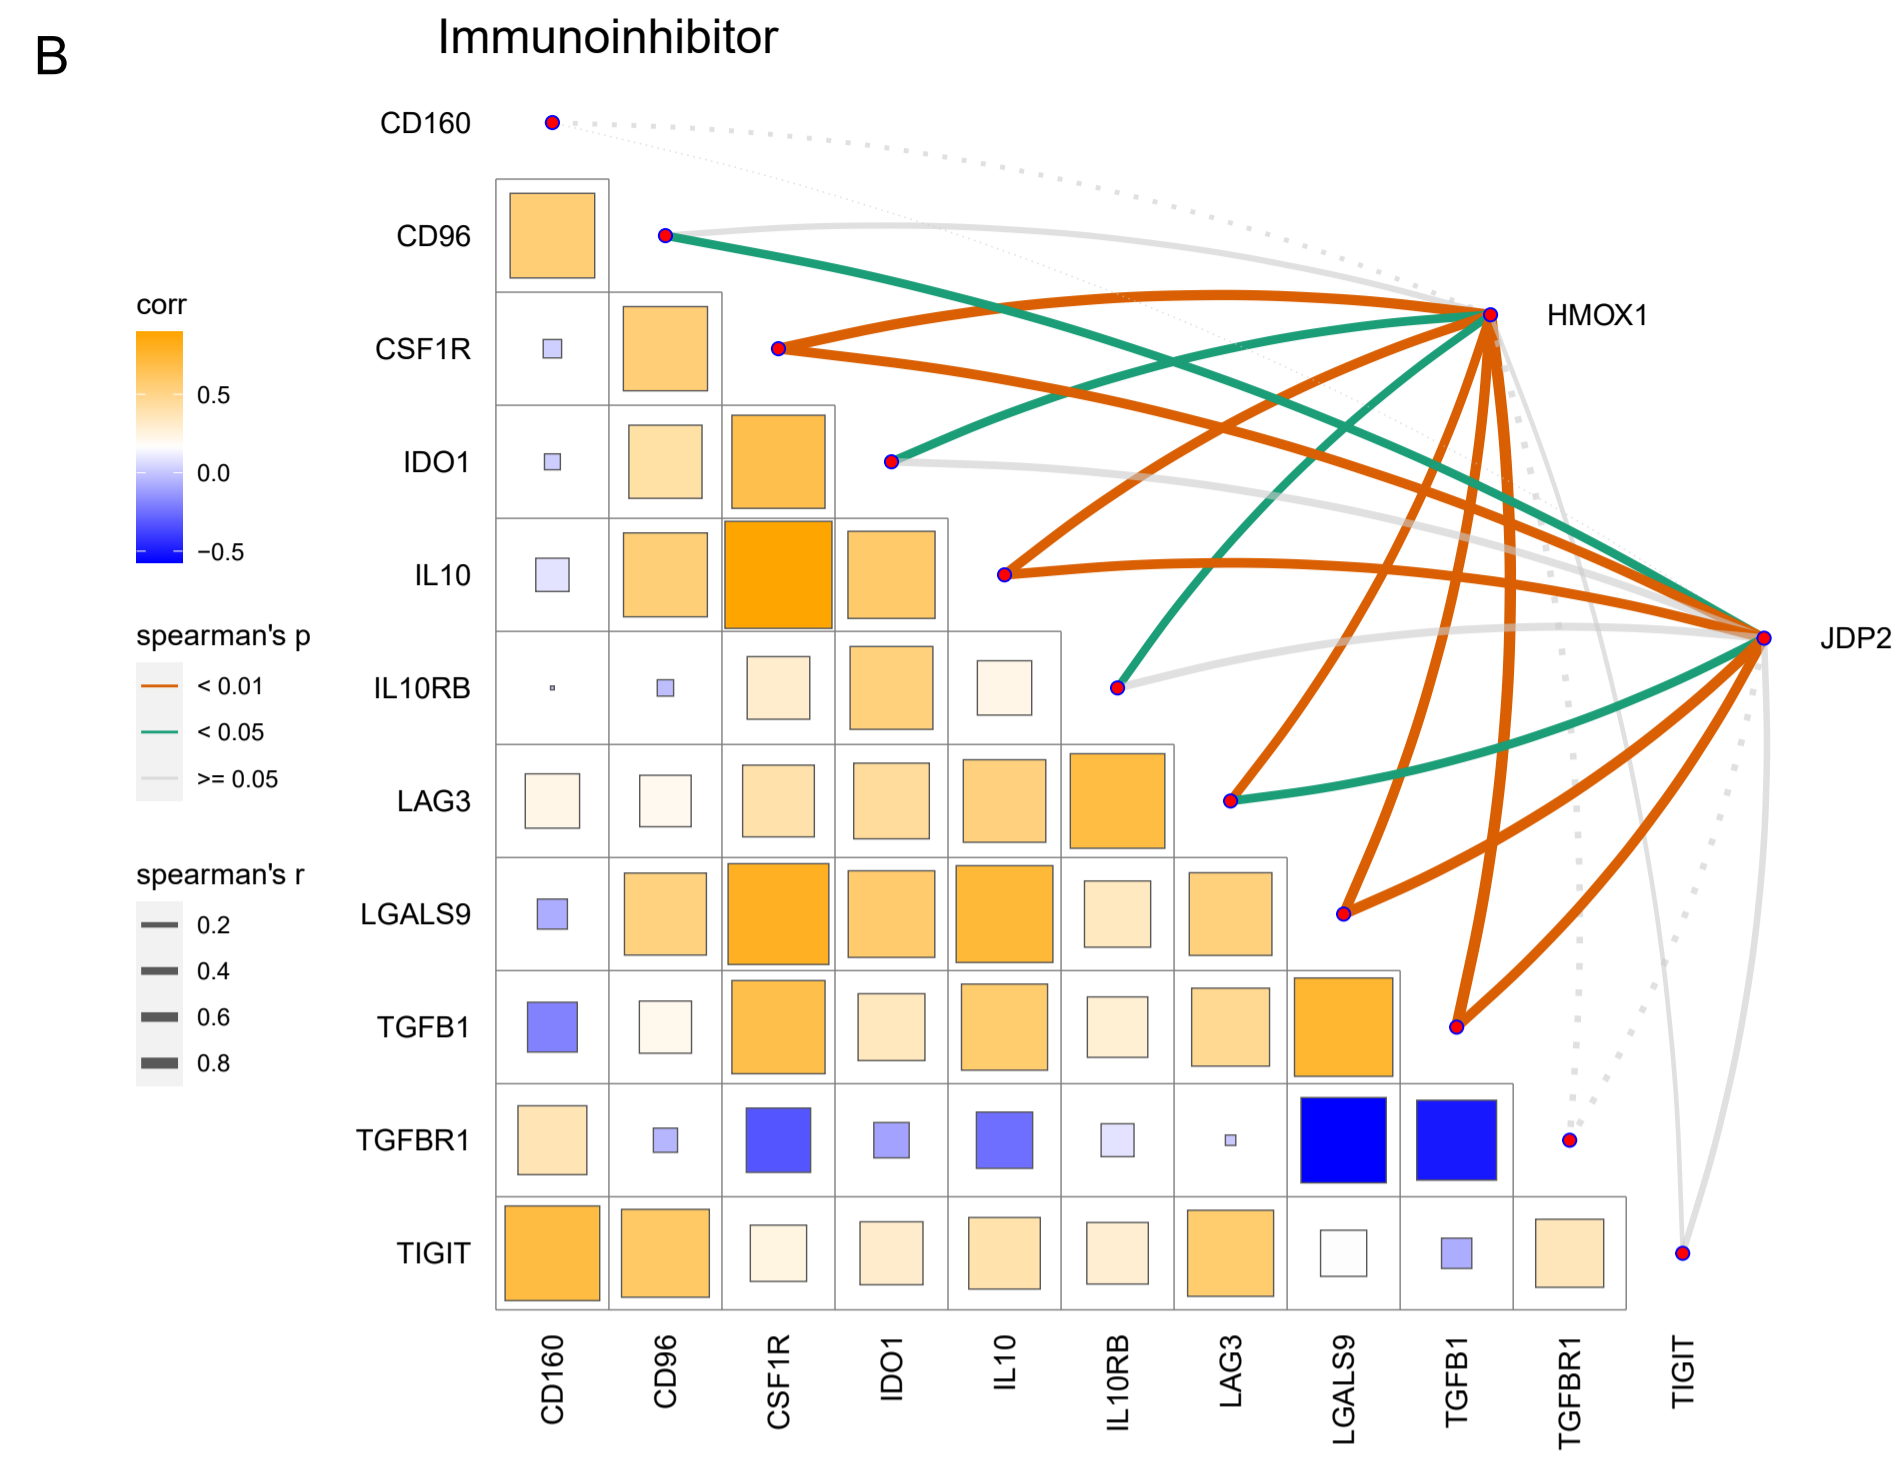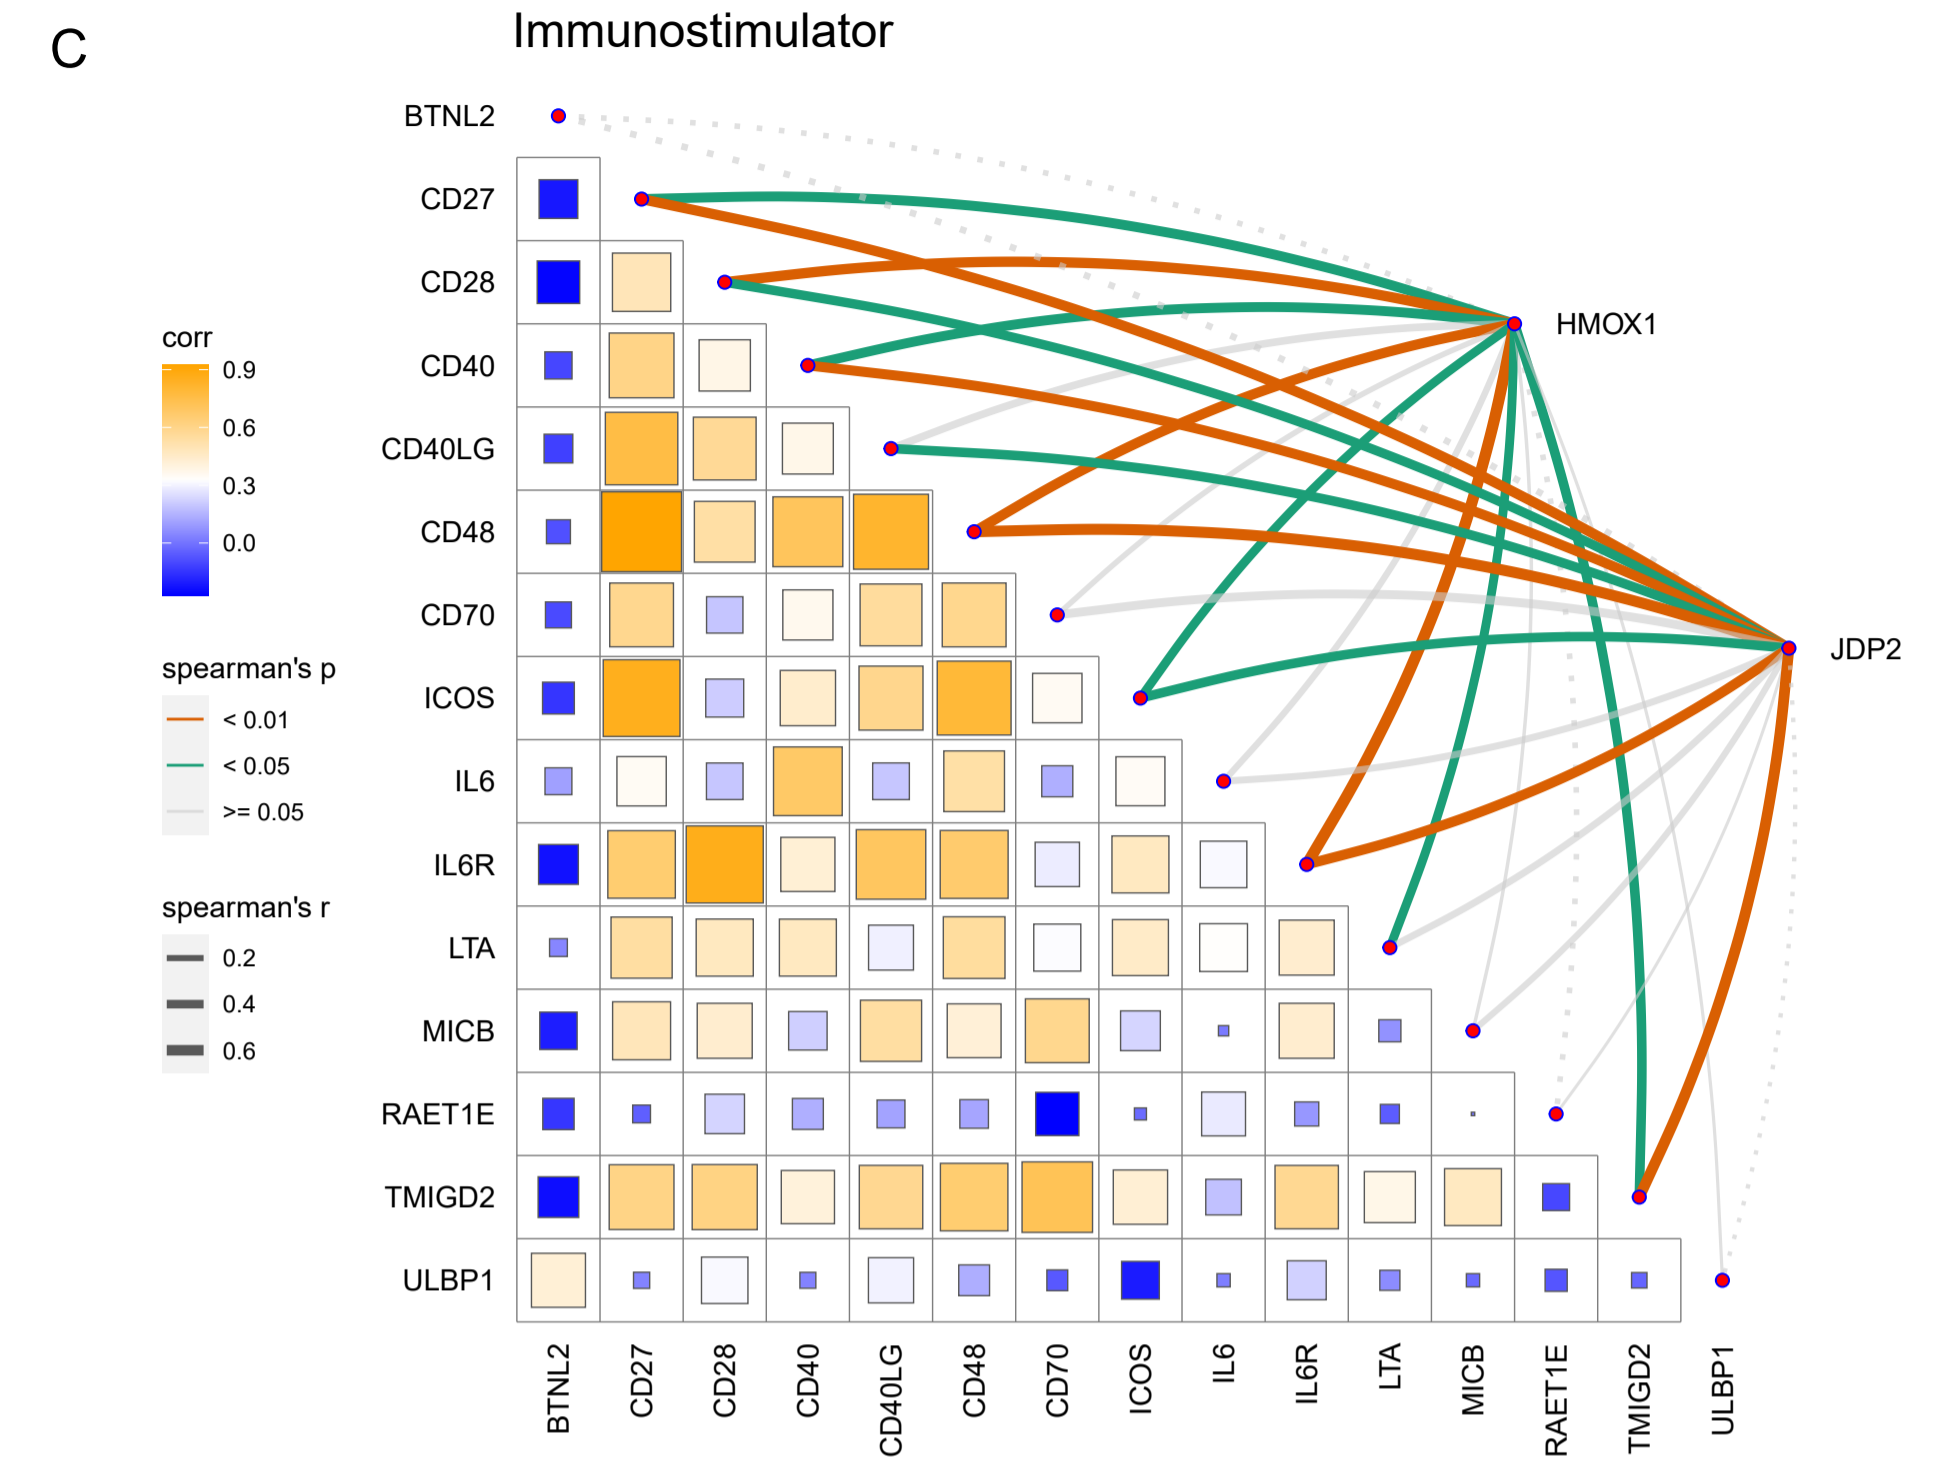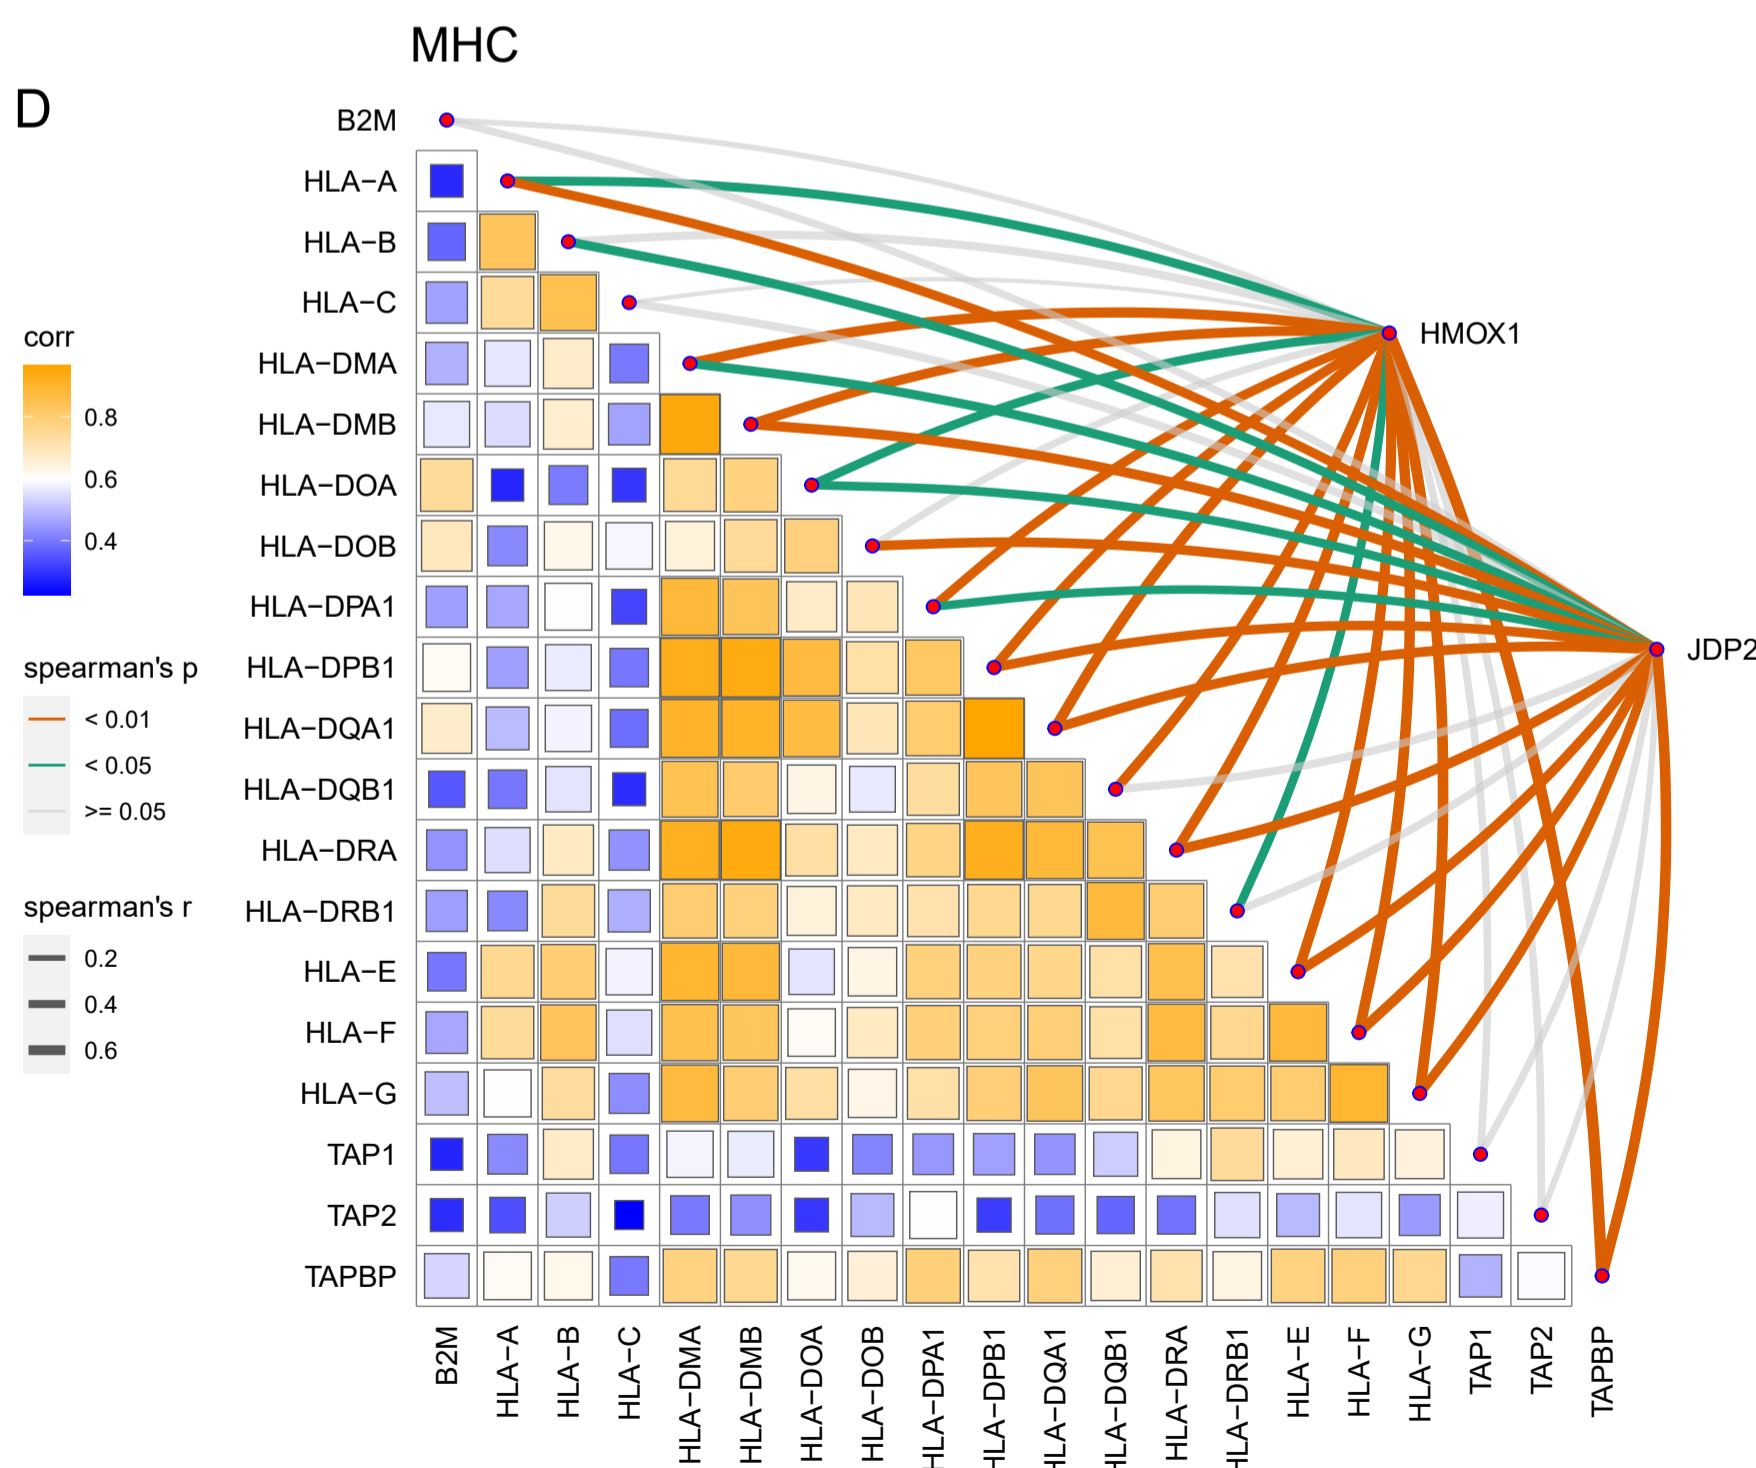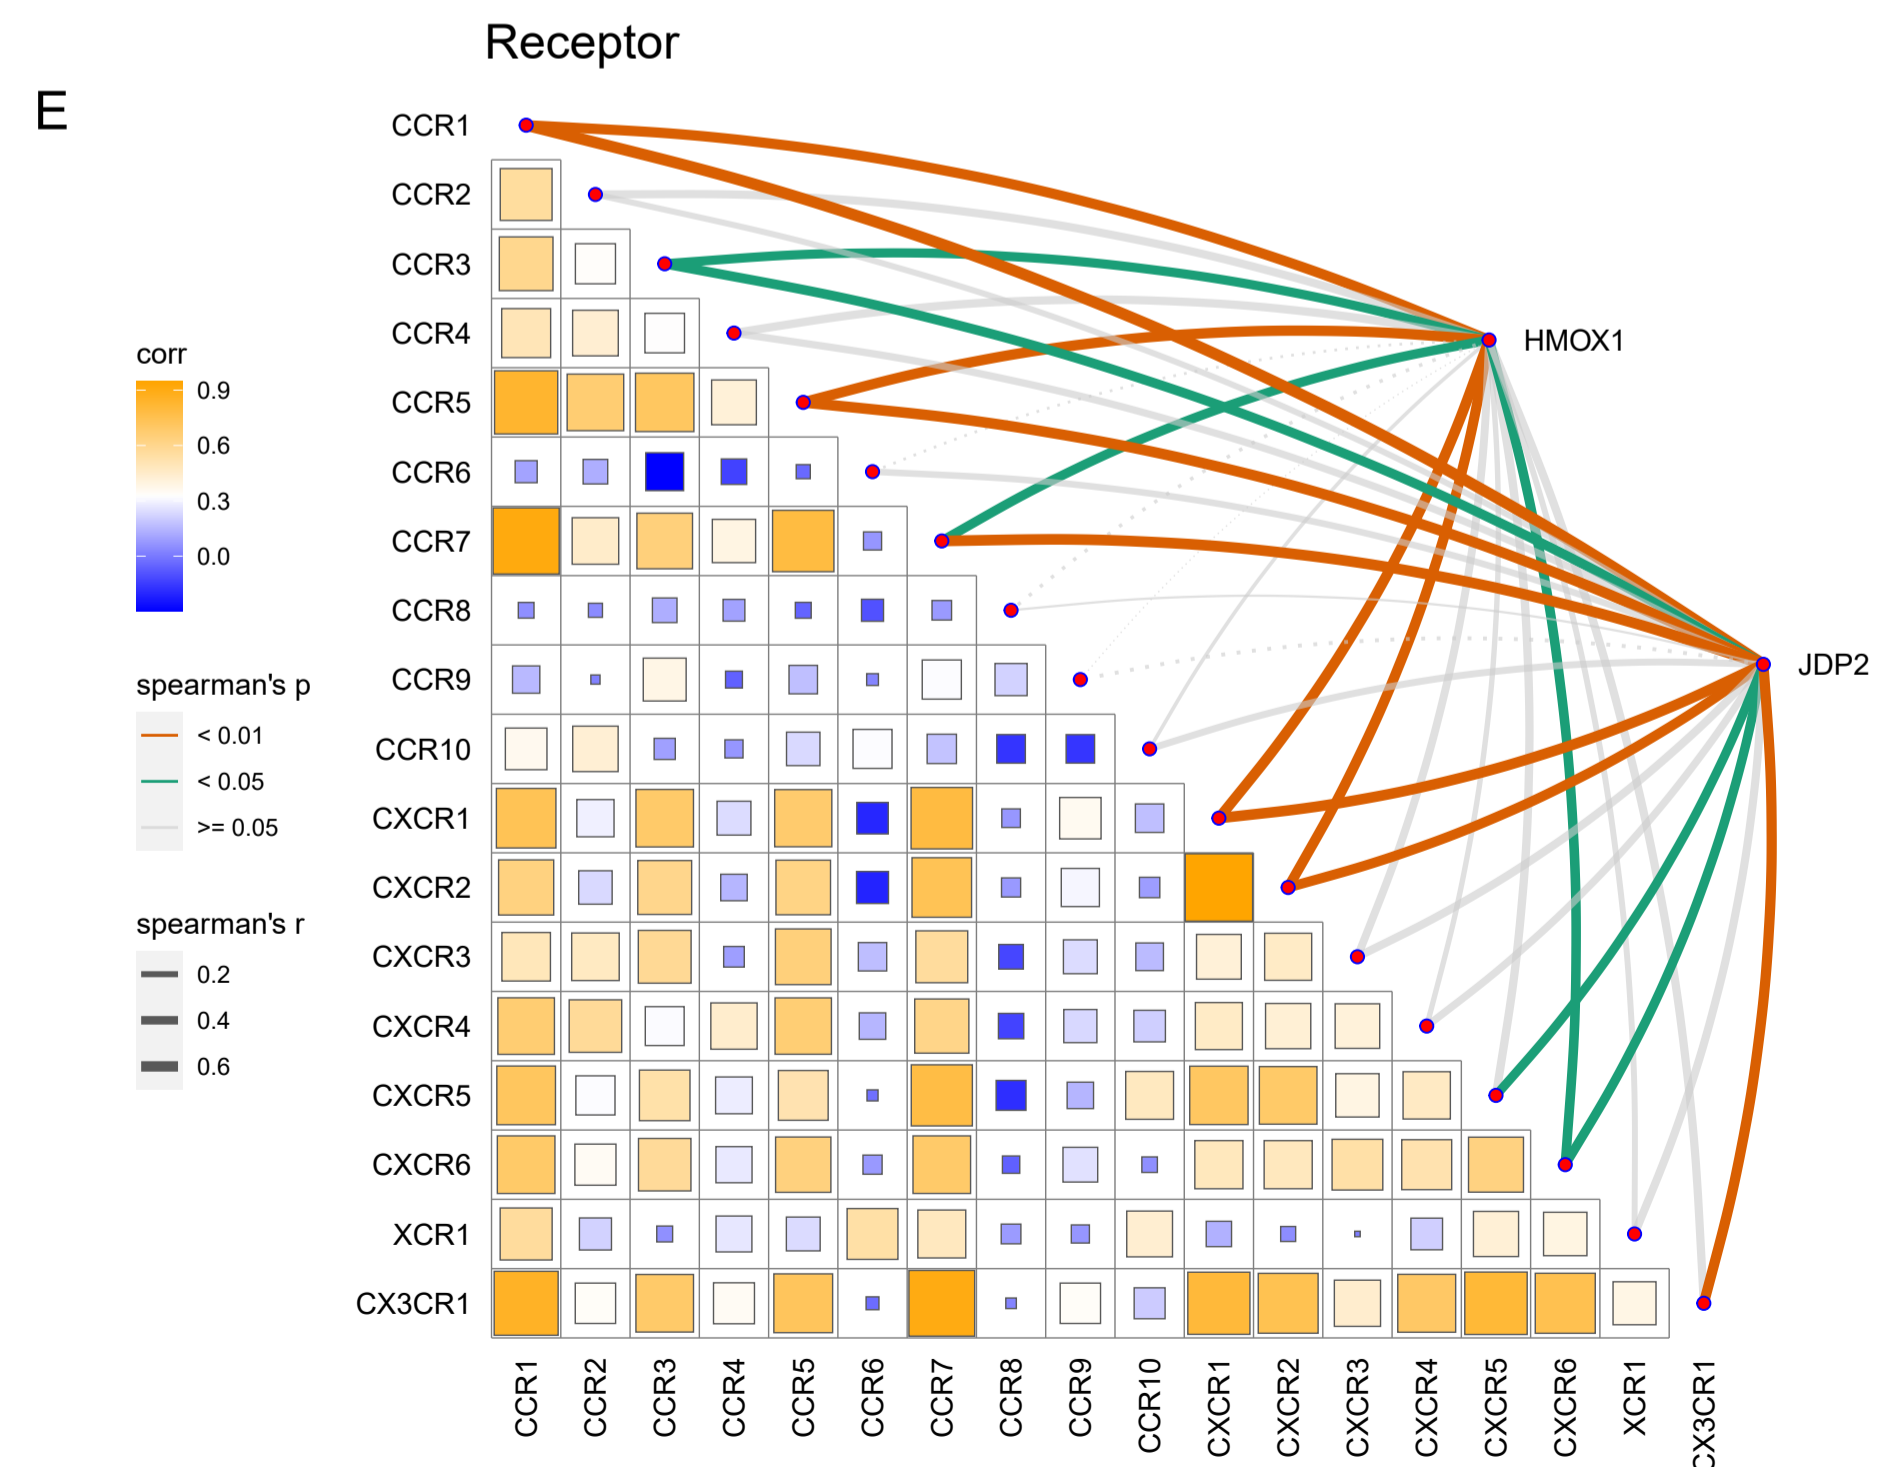

Supplement: pone.0293447.s002.pdf [file pone.0293447.s002.pdf]
